# Supplementary material for: Polyphenols and Polysaccharides from Morus alba L. Fruit Attenuate High-Fat Diet-Induced Metabolic Syndrome Modifying the Gut Microbiota and Metabolite Profile
Source: MDPI journal article supplement (doi:10.3390/foods11121818), 2022-06-20
Supplement: s1 [file s1]

Supplementary material

# **Integrated gut microbiota and untargeted fecal metabolomics reveal beneficial effects of polyphenols and polysaccharides from Mori Fructus (*Morus alba* L.) on HFD-induced metabolic syndrome in C57BL/6J mice**

Meixia Wan <sup>a, b</sup>, Qing Li <sup>a</sup>, Qianya Lei <sup>a</sup>, Dan Zhou <sup>a</sup>, Shu Wang <sup>a, \*</sup>

a: West China Sch Pharm, Sichuan University, No.17, Section 3, Renmin Nan Rd, Chengdu, 610041, Sichuan, Peoples R China

b: Qibo college of medicine, Longdong University, No.45, Lanzhou Rd, Qingyang, 745000, Gansu, Peoples R China

\*Corresponding author: Shu Wang, West China Sch Pharm, Sichuan University, No.17, Section 3, Renmin Nan Rd, Chengdu, 610041, Sichuan, Peoples R China, TEL: (86) 028-85503950, E-mail: suwang571@126.com.

**Table S1.** Statistics on reads/OTUs for 16S-rDNA sequencing (n = 4)

| Sample | clean_tags | valid_tags | valid mean Length | OTU_counts | Total_OTUs |
|--------|------------|------------|-------------------|------------|------------|
| NCD1   | 67177      | 54482      | 417.88            | 2351       | 9050       |
| NCD2   | 68985      | 58669      | 417.09            | 2065       | 9050       |
| NCD3   | 62971      | 55051      | 416.58            | 2193       | 9050       |
| NCD4   | 67591      | 57226      | 417.93            | 2181       | 9050       |
| HFD1   | 64450      | 55558      | 405.43            | 2917       | 9050       |
| HFD2   | 69896      | 59889      | 408.1             | 2987       | 9050       |
| HFD3   | 62745      | 52514      | 410.63            | 2763       | 9050       |
| HFD4   | 60007      | 50370      | 400.57            | 2469       | 9050       |
| PC1    | 66245      | 56643      | 408.65            | 3084       | 9050       |
| PC2    | 66919      | 56989      | 412.31            | 2569       | 9050       |
| PC3    | 59201      | 48767      | 411.72            | 2699       | 9050       |
| PC4    | 67422      | 56757      | 408.87            | 2944       | 9050       |
| MFP1   | 66119      | 58783      | 415.65            | 2443       | 9050       |
| MFP2   | 67568      | 60820      | 413.26            | 2428       | 9050       |
| MFP3   | 65447      | 58552      | 413.75            | 2490       | 9050       |
| MFP4   | 67376      | 59277      | 415.27            | 2472       | 9050       |
| MFS1   | 65807      | 58489      | 415.63            | 2501       | 9050       |
| MFS2   | 66249      | 58489      | 415.35            | 2636       | 9050       |
| MFS3   | 62763      | 56209      | 415.86            | 2469       | 9050       |
| MFS4   | 70213      | 60754      | 410.97            | 2887       | 9050       |
| MFPS1  | 64023      | 56974      | 416.61            | 2417       | 9050       |
| MFPS2  | 38604      | 29773      | 404.16            | 3318       | 9050       |
| MFPS3  | 65975      | 57040      | 417.31            | 2639       | 9050       |
| MFPS4  | 63803      | 57212      | 418.87            | 2035       | 9050       |

OTUs, operational taxonomic units

**Table S2.** The 23 common differential metabolites (n = 4)

| m/z      | RT<br>(min) | Ion mode | Metabolites                     | Formula    | VIP  | HFD<br>vs<br>NCD | PC vs<br>HFD | MFP<br>vs<br>HFD | MFS<br>vs<br>HFD | MFPS<br>vs<br>HFD |
|----------|-------------|----------|---------------------------------|------------|------|------------------|--------------|------------------|------------------|-------------------|
|          |             |          |                                 |            |      |                  |              |                  |                  |                   |
| 542.3256 | 6.13        | pos      | LysoPC(20:5(5Z,8Z,11Z,14Z,17Z)) | C28H48NO7P | 1.03 | ↑ #              | —            | —                | ↓ *              | —                 |
| 189.1597 | 0.63        | pos      | N6,N6,N6-Trimethyl-L-lysine     | C9H20N2O2  | 1.08 | ↑ ##             | —            | —                | ↓ **             | ↓ **              |
| 118.0653 | 4.20        | pos      | Indole                          | C8H7N      | 1.61 | ↑ ##             | ↓ **         | —                | ↓ **             | ↓ **              |
| 133.0972 | 0.61        | pos      | L-Ornithine                     | C5H12N2O2  | 1.61 | ↑ ##             | ↓ *          | ↓ *              | ↓ **             | ↓ *               |
| 335.2196 | 9.58        | pos      | 7S,8S-DiHODE                    | C18H32O4   | 1.80 | ↑ ##             | ↓ **         | ↓ **             | ↓ **             | ↓ **              |
| 283.1442 | 4.94        | pos      | NAC                             | C17H18N2O2 | 1.84 | ↓ ##             | ↑ **         | ↑ **             | ↑ **             | ↑ **              |
| 175.1077 | 0.72        | pos      | N-Acetylornithine               | C7H14N2O3  | 2.14 | ↑ ##             | ↓ *          | ↓ *              | —                | —                 |

|          |       |     |                         |            |       |                 |                 |                 |                 |                 |
|----------|-------|-----|-------------------------|------------|-------|-----------------|-----------------|-----------------|-----------------|-----------------|
| 268.1038 | 1.18  | pos | Adenosine               | C10H13N5O4 | 4.04  | ↑ <sup>##</sup> | —               | —               | ↓ <sup>**</sup> | ↓ <sup>**</sup> |
| 589.3016 | 7.59  | pos | D-Urobilin              | C33H40N4O6 | 4.95  | ↓ <sup>##</sup> | ↑ <sup>**</sup> | ↑ <sup>*</sup>  | ↑ <sup>**</sup> | ↑ <sup>**</sup> |
| 118.0865 | 1.08  | pos | L-Valine                | C5H11NO2   | 6.45  | ↑ <sup>#</sup>  | ↓ <sup>*</sup>  | ↓ <sup>*</sup>  | ↓ <sup>*</sup>  | ↓ <sup>*</sup>  |
| 104.1074 | 0.66  | pos | Choline                 | C5H13NO    | 7.02  | ↓ <sup>##</sup> | —               | ↑ <sup>*</sup>  | ↑ <sup>*</sup>  | ↑ <sup>**</sup> |
| 176.1029 | 0.67  | pos | Citrulline              | C6H13N3O3  | 8.05  | ↑ <sup>#</sup>  | ↓ <sup>*</sup>  | ↓ <sup>*</sup>  | ↓ <sup>*</sup>  | ↓ <sup>*</sup>  |
| 353.2298 | 9.12  | pos | 9,12,13-TriHOME         | C18H34O5   | 8.26  | ↑ <sup>##</sup> | ↓ <sup>**</sup> | ↓ <sup>**</sup> | ↓ <sup>**</sup> | ↓ <sup>**</sup> |
| 116.0708 | 0.72  | pos | L-Proline               | C5H9NO2    | 10.62 | ↑ <sup>#</sup>  | ↓ <sup>*</sup>  | ↓ <sup>*</sup>  | ↓ <sup>*</sup>  | ↓ <sup>*</sup>  |
| 357.2784 | 10.83 | pos | Tetracosahexaenoic acid | C24H36O2   | 17.89 | ↓ <sup>##</sup> | ↑ <sup>**</sup> | ↑ <sup>**</sup> | ↑ <sup>**</sup> | ↑ <sup>**</sup> |
| 132.1020 | 1.36  | pos | L-Isoleucine            | C6H13NO2   | 28.11 | ↑ <sup>##</sup> | ↓ <sup>**</sup> | ↓ <sup>**</sup> | ↓ <sup>**</sup> | ↓ <sup>**</sup> |
| 269.0416 | 4.67  | neg | Orotidine               | C10H12N2O8 | 1.58  | ↑ <sup>#</sup>  | ↓ <sup>*</sup>  | ↓ <sup>*</sup>  | —               | ↓ <sup>*</sup>  |
| 66.0881  | 0.73  | neg | N-Acetyl-D-glucosamine  | C8H15NO6   | 2.43  | ↓ <sup>#</sup>  | —               | —               | —               | ↑ <sup>*</sup>  |
| 313.2386 | 10.41 | neg | 12,13-DHOME             | C18H34O4   | 4.56  | ↑ <sup>##</sup> | ↓ <sup>**</sup> | ↓ <sup>*</sup>  | ↓ <sup>*</sup>  | ↓ <sup>**</sup> |
| 540.3310 | 11.22 | neg | PC (16:0/0:0)           | C24H50NO7P | 5.05  | ↓ <sup>#</sup>  | —               | ↑ <sup>*</sup>  | ↑ <sup>*</sup>  | ↑ <sup>*</sup>  |
| 437.2910 | 9.71  | neg | Ursodeoxycholic acid    | C24H40O4   | 5.15  | ↓ <sup>##</sup> | ↑ <sup>**</sup> | ↑ <sup>*</sup>  | —               | —               |
| 165.0547 | 5.50  | neg | L-3-Phenyllactic acid   | C9H10O3    | 5.28  | ↑ <sup>#</sup>  | ↓ <sup>*</sup>  | ↓ <sup>*</sup>  | —               | ↓ <sup>*</sup>  |
| 783.5786 | 9.85  | neg | Hyodeoxycholic acid     | C24H40O4   | 7.31  | ↓ <sup>#</sup>  | ↑ <sup>**</sup> | —               | ↑ <sup>*</sup>  | ↑ <sup>**</sup> |

RT, retention time; VIP, variable importance of projection; Data were expressed as the mean ± standard deviation (n = 4). <sup>#</sup>*P* < 0.05, <sup>##</sup>*P* < 0.01 vs. NCD group; <sup>\*</sup>*P* < 0.05, <sup>\*\*</sup>*P* < 0.01 vs. HFD group. '↑' and '↓' indicate metabolites with an upward or downward trend. # and ## represent compared with NCD group, <sup>\*</sup>*P* < 0.05, <sup>\*\*</sup>*P* < 0.01, respectively. \* and \*\* represent compared with HFD group, <sup>\*</sup>*P* < 0.05, <sup>\*\*</sup>*P* < 0.01, respectively.

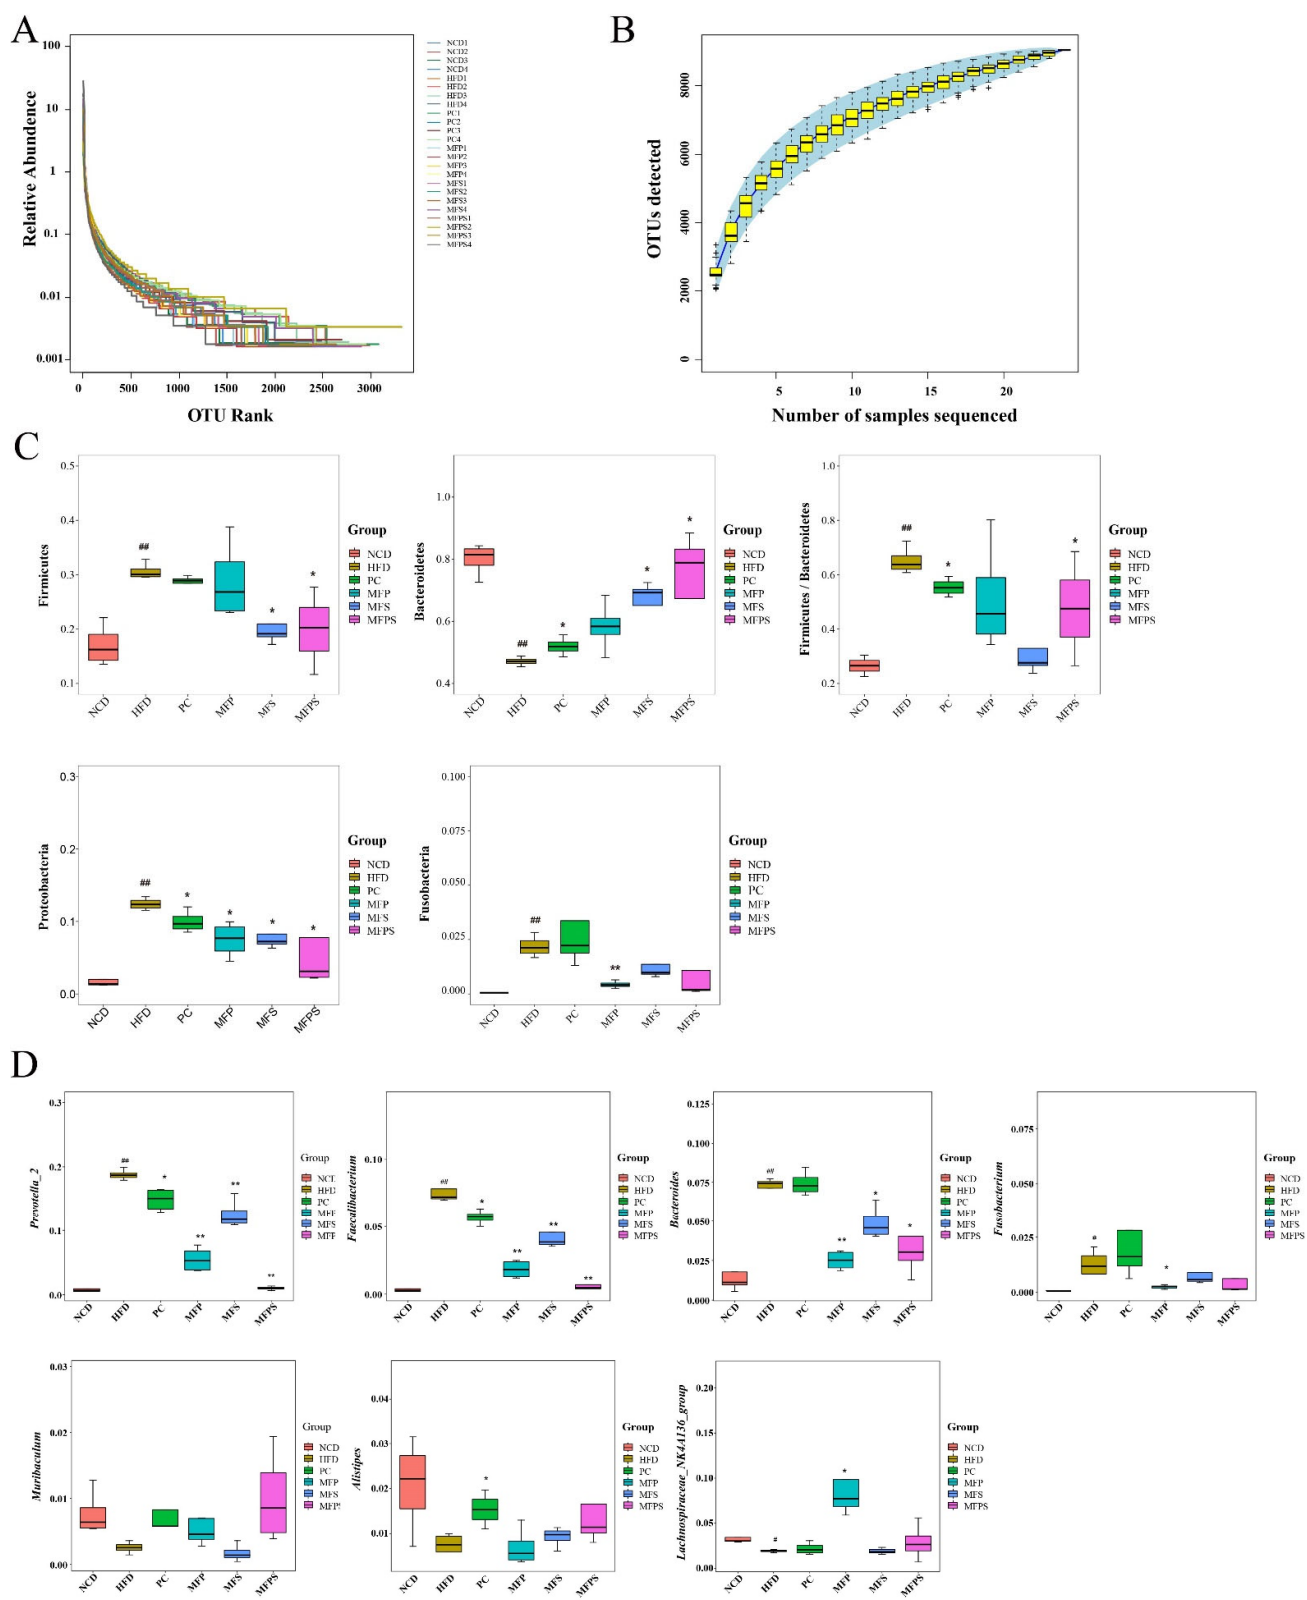

**Figure. S1.** The improvement of gut microbiota dysbiosis in HFD-induced mice after MFP, MFS and MFPs treatments (n = 4). (A) Rank-abundance distribution curve. (B) Species accumulation

curves. (C and D) Taxonomic analysis was performed to analyze the effects of MFP, MFS and MFPS on composition of gut microbiota at phylum (C) and genus. \* $P < 0.05$ , \*\* $P < 0.01$  vs. NCD group; \* $P < 0.05$ , \*\* $P < 0.01$  vs. HFD group.

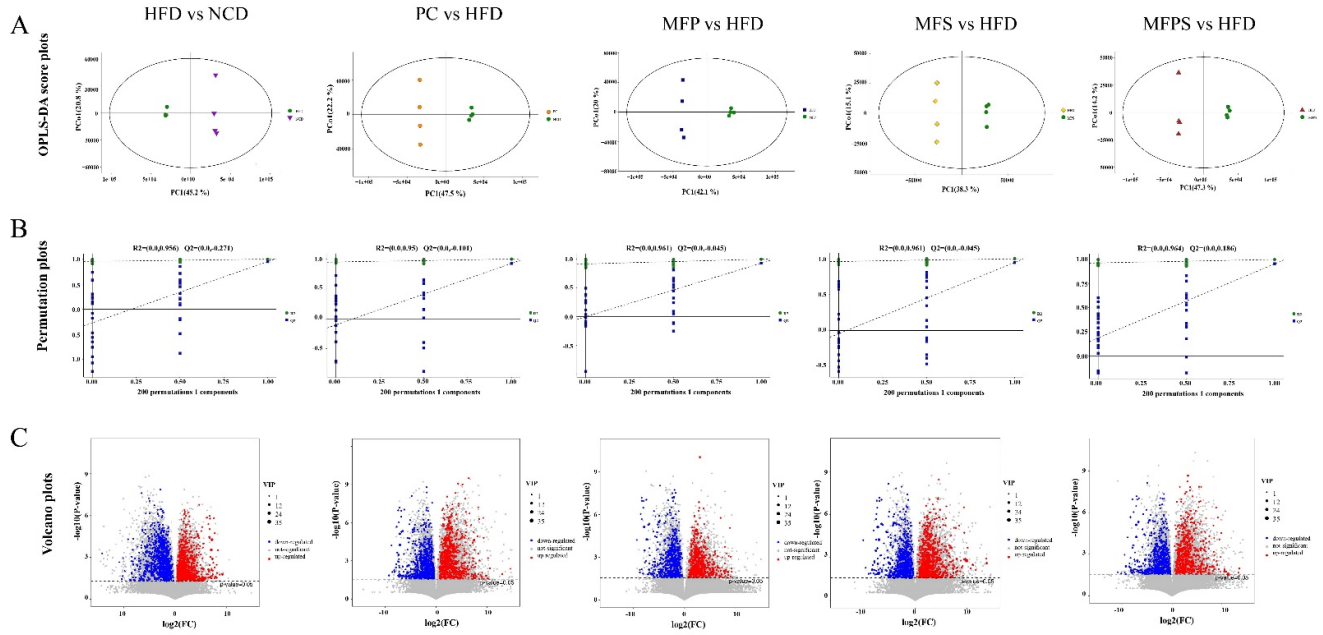

**Figure. S2.** The changes of fecal metabolites in HFD-induced mice after MFP, MFS and MFPS treatments (n = 4). (A) OPLS-DA score plots. (B) Permutation plots. (C) Volcano plots.
